# Supplementary material for: Mesenchymal Stem Cells Antagonize IFN-Induced Proinflammatory Changes and Growth Inhibition Effects via Wnt/β-Catenin and JAK/STAT Pathway in Human Outer Root Sheath Cells and Hair Follicles
Source: MDPI journal article supplement (doi:10.3390/ijms22094581), 2021-04-27
Supplement: s1 [file s1]

# Mesenchymal Stem Cells antagonize IFN-induced proinflammatory changes and growth inhibition effects via Wnt/ $\beta$ -catenin and JAK/STAT pathway in Human Outer Root Sheath Cells and Hair Follicles

All primers (**Table S1**) were designed using the coding sequences available on the GenBank database ([http://www.ncbi.nlm.nih.gov/Genbank/Genbank\\_Search.html](http://www.ncbi.nlm.nih.gov/Genbank/Genbank_Search.html)) and were synthesized by Bioneer custom oligo synthesis service (Bioneer, Daejeon, Korea).

**Table S1.** Primer sequence

| Species | Primer name      | Forward (5'-3')                | Reverse (5'-3')                   |
|---------|------------------|--------------------------------|-----------------------------------|
| Human   | NLRP3            | ACA AGC CAC CTC ACT TCC AG     | CCA ACC ACA ATC TCC GAA TG        |
|         | ASC              | TCA CAG AAG TGG ACG GAG TG     | TGT CTT GGC TGG TGG TCT CT        |
|         | caspase-1        | TAT CCG TTC CAT GGG TGA AG     | TCA AAG CTC GGG TCT TAT CC        |
|         | IL-1 $\beta$     | GCC AAT CTT CAT TGC TCA AGT    | ACT TCA TCT GTT TAG GGC CA        |
|         | CXCL9            | GAC CTT AAA CAA TTT GCC CCA AG | TCC TTC ACA TCT GCT GAA TCT GG    |
|         | CXCL10           | GCA AGC CAA TTT TGT CCA CG     | ACA TTT CCT TGC TAA CTG CTT TCA G |
|         | CXCL11           | GAG CAG CAA AGC TGA AGT AG     | AGG GCC TAT GCA AAG ACA G         |
|         | TNF $\alpha$     | CAC CAC TTC GAA ACC TGG GA     | AGG AAG GCC TAA GGT CCA CT        |
|         | IL-10            | GCT GAG AAC CAA GAC CCA GAC A  | CGG CCT TGC TCT TGT TTT CA        |
|         | IL-15            | GCC TTC ATG GTA TTG GGA A      | TGC TGT TAC TTT GCA ACT GG        |
|         | IL-18            | AGC TGA AGA TGA TGA AAA CCT G  | ATA GAG GCC GAT TTC CTT GG        |
|         | IFN- $\gamma$ R  | GCA TGG CTC TCC TCT TTC TC     | CTG TGG CAT GAT CTG GTA CT        |
|         | MICA             | GAA TCC GGC GTA GTC CTG AG     | TCC GGG GAT AGA AGC TGG AA        |
|         | WNT3             | ATG AAC AAG CAC AAC AAC GAG    | TTG AGG AAG TCG CCG ATA G         |
|         | WNT5             | CCC TGT ACA GAG ACC CGA GA     | ACA ACT GGC ACA GCT TCC TC        |
|         | WNT7             | TCT GTA ACA AGA TCC CAG GC     | CAT TGC GGA ACT GAA ACT GA        |
|         | WNT10            | CCC GGG ACA TCC AGG CGA GA     | CTC TGG CGC TGC CCT CCA AC        |
|         | GSK-3 $\beta$    | CTT GGA CAA AGG TCT TCC GGC C  | GTT GGC AGG CGG TGA AGC AG        |
|         | $\beta$ -catenin | TTT AAG CCT CTC GGT CTG TG     | CAA ATA CCC TCA GGG GAA CA        |
|         | Cyclin D1        | GAC AGA CCG CGG CTC CTT        | CAA CGT GAA TCT GGT TCC GA        |
|         | DKK1             | TGT GCT AGA CAC TTC TGG TC     | TTC TCC ACA GTA ACA ACG CT        |
|         | TGF- $\beta$ 2   | AAC TGT CTG CCC AGT TGT TA     | GCT GAG ACG TCA AAT CGA AC        |
|         | LEF1             | CAG GTA CAG GTC CAA GAA TG     | CTA GCA GTG ACC TCA GGG TA        |
|         | AXIN2            | GCA GTA AGA AAC AGC TCC AG     | CCC TCT CTC TCT TCA TCC TC        |
|         | KRT15            | GGT GTA GGG TCT GAA GAA CA     | CCA CAC CAG AAG AGT AAA GC        |
|         | IGF1             | AAT CCC TCT TCT GCT TGC TA     | ATT TTC CCC ATC GCT TCT GA        |
|         | FGF2             | AGA AGA GCG ACC CTC ACA TC     | ACT GCC CAG TTC GTT TCA GT        |
|         | FGF7             | AAT TGT GGC AAT CAA AGG GG     | CCG TTG TGT GTC CAT TTA GC        |
|         | PDGF             | TGA TCT CCA AAC GCC TGC T      | TCA TGT TCA GGT CCA ACT CG        |
|         | VEGF             | TGC CCG CTG CTG TCT AAT        | TCT CCG CTC TGA GCA AGG           |
|         | SHH              | GAG ATG TCT GCT GCT AGT CC     | GGA GAT CTT CCC TTC ATA CC        |
|         | BMP2             | GCT GTA AGA GAC ACC CTT TG     | GAG TTG ACC AAC GTC TGA AC        |
|         | BMP4             | CAG GAG AGC AGA AAC AAG AG     | CTC ACT CTC TCT GGA CCT CA        |
|         | APLP             | TGT GGA GTA TGT GTG CTG TC     | GTT TCC TCT TCC TCT TCA GC        |
|         | Versican         | ACA AAG GGA GAG TGT CTG TG     | CCC TGT AGT GAA ACA CAA CC        |
|         | CRABP1           | GGC TTG CTC CTA CTT TCA G      | CCA AAC TAT GGA GCA CTA GG        |
|         | NOGGIN           | GAA CAC CCA GAC CCT ATC TT     | CTC TAG CCC TTT GAT CTC G         |
|         | SOX2             | ACA ACT CGG AGA TCA GCA        | GCA GCG TGT ACT TAT CCT TC        |
|         | GAPDH            | GAA GGT GAA GGT CGG AGT CAA    | GCT CCT GGA AGA TGG TGA TG        |
